# Supplementary material for: COX-2 metabolic products, the prostaglandin I2 and F2α, mediate the effects of TNF-α and Zn2+ in stimulating the phosphorylation of Tau
Source: PubMed Central journal article supplement (PMC5725093; doi:10.18632/oncotarget.21853), 2017-10-16
Supplement: oncotarget-08-99296-s001.pdf [file oncotarget-08-99296-s001.pdf]

# COX-2 metabolic products, the prostaglandin I<sub>2</sub> and F<sub>2α</sub>, mediate the effects of TNF-α and Zn<sup>2+</sup> in stimulating the phosphorylation of Tau

## SUPPLEMENTARY MATERIALS

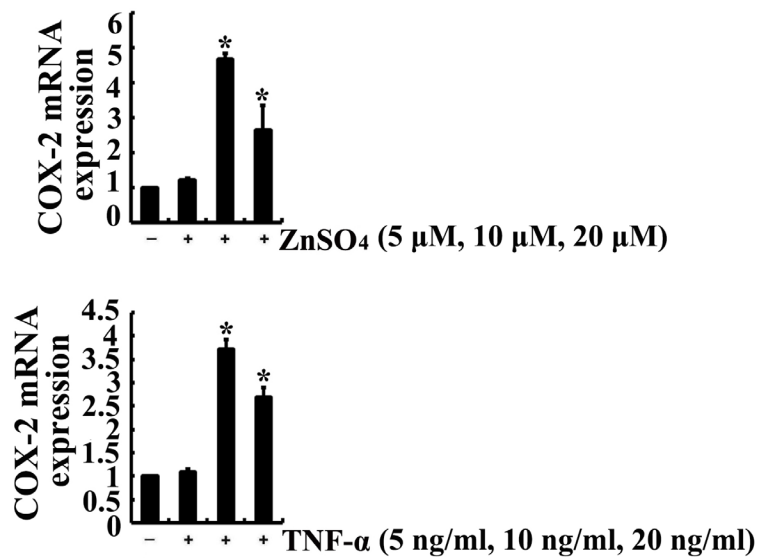

Supplementary Figure 1:

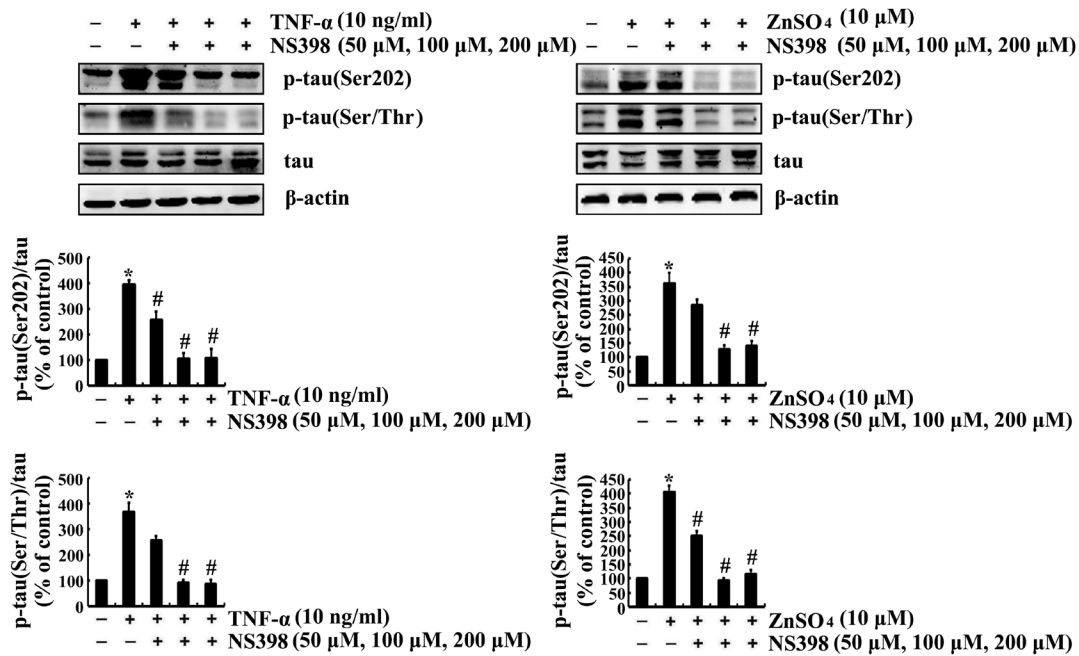

Supplementary Figure 2:

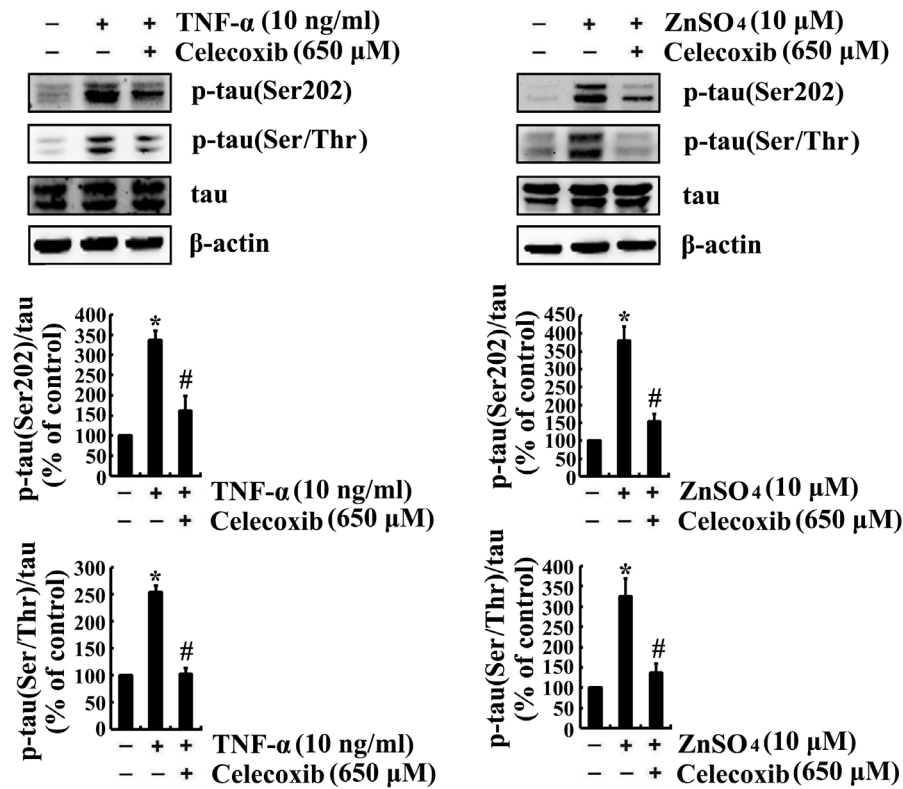

Supplementary Figure 3:
